# Supplementary material for: Plasma Calprotectin Levels Associate With New‐Onset Hypertension in the General Population: A Prospective Cohort Study
Source: PubMed Central journal article supplement — J Am Heart Assoc. 2023 Dec 29;13(1):e031458. doi: 10.1161/JAHA.123.031458 (PMC10863804; doi:10.1161/jaha.123.031458), 2023-12-29
Supplement: JAH3-13-e031458-s001.pdf [file JAH3-13-e031458-s001.pdf]

# **Supplemental Material**

**Table S1. Stratified analyses for the association between plasma calprotectin levels and the risk of incident hypertension across various subgroups.**

| <b>Variable</b>            | <b>Total (n)</b> | <b>New-onset hypertension (n)</b> | <b>HR (95% CI)*</b> | <b>P-value for interaction</b> |
|----------------------------|------------------|-----------------------------------|---------------------|--------------------------------|
| <b>Sex</b>                 |                  |                                   |                     |                                |
| Male                       | 1,662            | 540                               | 1.15 [0.98-1.35]    | 0.023                          |
| Female                     | 1,862            | 460                               | 0.89 [0.77-1.03]    |                                |
| <b>BMI</b>                 |                  |                                   |                     |                                |
| < 25 kg/m <sup>2</sup>     | 1,705            | 356                               | 0.98 [0.82-1.16]    | 0.533                          |
| ≥ 25 kg/m <sup>2</sup>     | 1,818            | 643                               | 1.03 [0.90-1.19]    |                                |
| <b>Current smoking</b>     |                  |                                   |                     |                                |
| No                         | 2,472            | 674                               | 1.01 [0.88-1.15]    | 0.773                          |
| Yes                        | 1,038            | 320                               | 0.97 [0.81-1.16]    |                                |
| <b>History of diabetes</b> |                  |                                   |                     |                                |
| No                         | 3498             | 982                               | 1.00 [0.90-1.11]    | 0.119                          |
| Yes                        | 26               | 15                                | 0.45 [0.18-1.13]    |                                |
| <b>Total cholesterol†</b>  |                  |                                   |                     |                                |
| ≤ 5.52 mmol/L              | 2,066            | 496                               | 0.95 [0.82-1.11]    | 0.341                          |
| > 5.52 mmol/L              | 1,437            | 494                               | 1.04 [0.89-1.21]    |                                |
| <b>eGFR†</b>               |                  |                                   |                     |                                |

|                                         |       |     |                  |       |
|-----------------------------------------|-------|-----|------------------|-------|
| ≤ 94 mL/min/1.73m <sup>2</sup>          | 1,313 | 469 | 0.99 [0.84-1.17] | 0.442 |
| > 94 mL/min/1.73m <sup>2</sup>          | 2,056 | 482 | 1.07 [0.92-1.24] |       |
| <b>UAE<sup>†</sup></b>                  |       |     |                  |       |
| ≤ 9.3 mg/24-h                           | 2,227 | 501 | 0.95 [0.83-1.09] | 0.004 |
| > 9.3 mg/24-h                           | 1,296 | 498 | 1.11 [0.30-1.31] |       |
| <b>Urinary Na-excretion<sup>†</sup></b> |       |     |                  |       |
| ≤ 92 mmol/l                             | 1,850 | 501 | 0.94 [0.82-1.08] | 0.107 |
| > 92 mmol/l                             | 1,608 | 490 | 1.11 [0.94-1.31] |       |
| <b>Hs-CRP<sup>†</sup></b>               |       |     |                  |       |
| ≤ 1.4 mg/l                              | 1,799 | 391 | 0.97 [0.83-1.12] | 0.743 |
| > 1.4 mg/l                              | 1,201 | 384 | 1.04 [0.89-1.21] |       |
| <b>Baseline SBP<sup>†</sup></b>         |       |     |                  |       |
| ≤ 127 mmHg                              | 2,751 | 506 | 1.05 [0.91-1.21] | 0.485 |
| > 127 mmHg                              | 773   | 494 | 1.03 [0.89-1.20] |       |

<sup>\*</sup>Adjusted for potential confounding factors including all variables incorporated in Model 4, see **Table 2**.

<sup>†</sup>Cut-offs determined by taking the median among participants undergoing the event (new-onset hypertension). Abbreviations: BMI, body-mass index; CI, confidence interval; eGFR, estimated glomerular filtration rate; HR, hazard ratio; hs-CRP, high-sensitive C-reactive protein; SBP, systolic blood pressure; UAE, urinary albumin excretion.

**Figure S1. Directed Acyclic Graph (DAG) visualizing the hypothesized causal relationships involved in the association between plasma calprotectin levels (as surrogate of low-grade systemic inflammation and oxidative stress) and the risk of new-onset hypertension in the general population.**

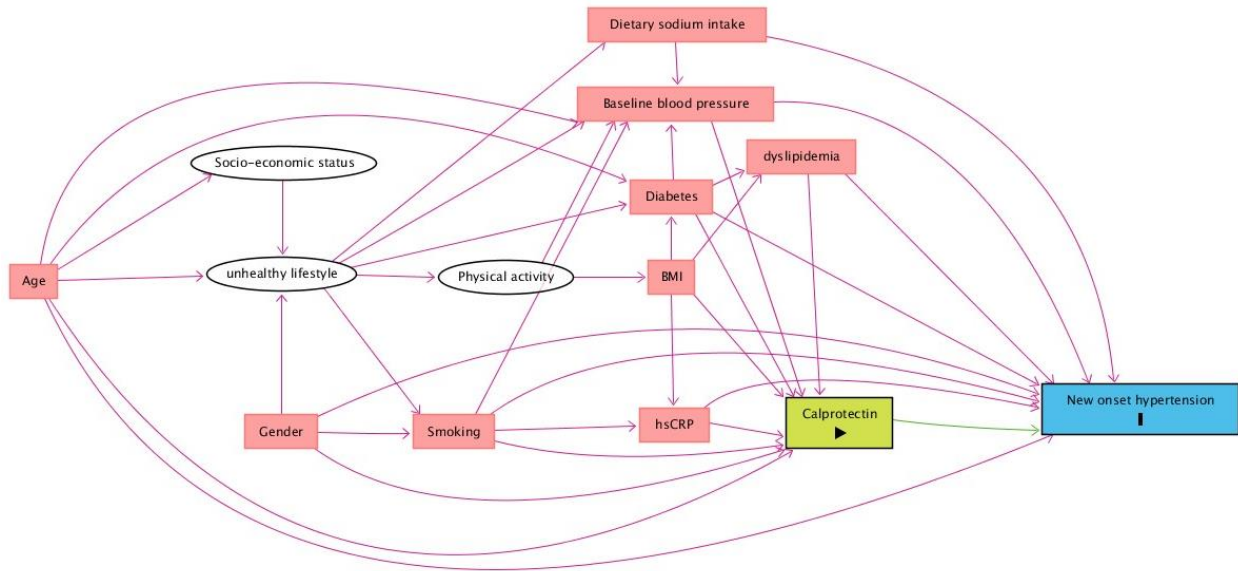

Based on the DAG we selected a distinct set of covariates to control for with the goal of achieving an unconfounded effect estimate.
